# Supplementary material
Source: publisher figshare collection journal article supplement (https://acs.figshare.com/ndownloader/files/4861282)
Supplement: Supplementary file 1 [file 4861282]

# Supporting Information

## **Engineering reduced graphene oxide aerogel produced by effective $\gamma$ -ray radiation-induced self-assembly and its application for continuous oil–water separation**

Yalei He<sup>†‡§</sup>, Jihao Li<sup>†§</sup>, Kou Luo<sup>†</sup>, Linfan Li<sup>†</sup>, Jingbo Chen<sup>‡\*</sup>, and Jingye Li<sup>†\*</sup>

<sup>†</sup>CAS Center for Excellence on TMSR Energy System, Shanghai Institute of Applied Physics, Chinese Academy of Sciences, Shanghai, 201800, P. R. China. \* E-mail: jingyeli@sinap.ac.cn (J.Y.Li);

<sup>‡</sup>School of Materials Science & Engineering, Zhengzhou University, Zhengzhou 450002, People's Republic of China\* E-mail: chenjb@zzu.edu.cn(J.B.Chen)

§ Miss.Y.L. He and Dr. J.H. Li contributed equally to this work.

## Experimental Section

*Materials:* Natural graphite flakes ( $\sim 500\text{ }\mu\text{m}$ ) were purchased from Sigma-Aldrich to synthesize graphene oxide (GO). Concentrated sulfuric acid ( $\text{H}_2\text{SO}_4$ , 98%), concentrated nitric acid ( $\text{HNO}_3$ ), potassium persulfate ( $\text{K}_2\text{S}_2\text{O}_8$ ), phosphorus pentoxide ( $\text{P}_2\text{O}_5$ ), potassium permanganate ( $\text{KMnO}_4$ ), hydrogen peroxide ( $\text{H}_2\text{O}_2$ , 30%) solution, hydrochloric acid ( $\text{HCl}$ ), ethylenediamine (EDA), ethanol, and ferroferric oxide ( $\text{Fe}_3\text{O}_4$ ), were purchased from Sinopharm Chemical Reagent Co., Ltd., China. Ultrapure water (Milli-Q purification system, Millipore, USA) was used for all experiments in this paper.

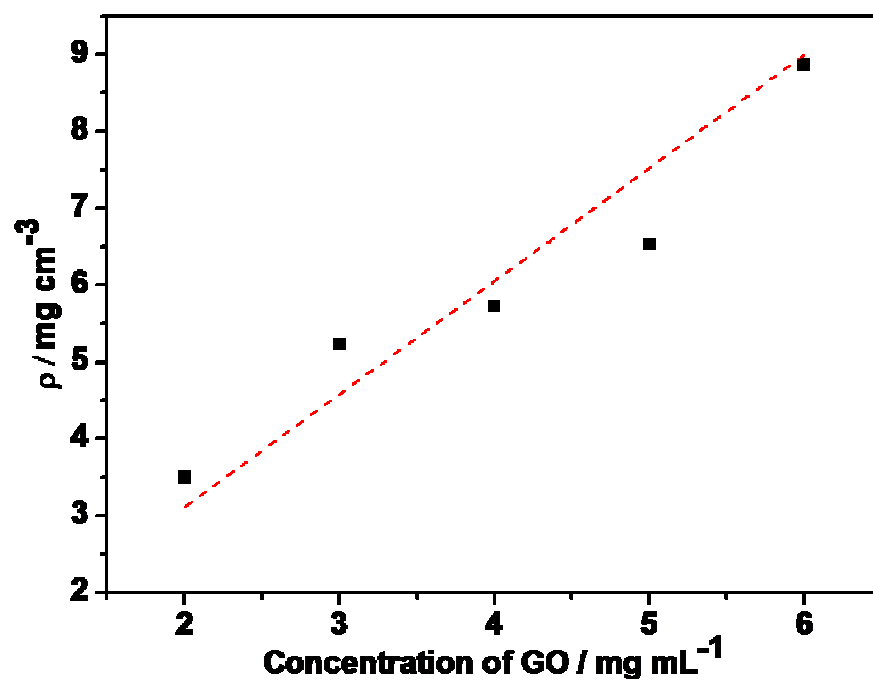

**Figure S1** The density of RGO aerogel as a function of the concentration of GO.

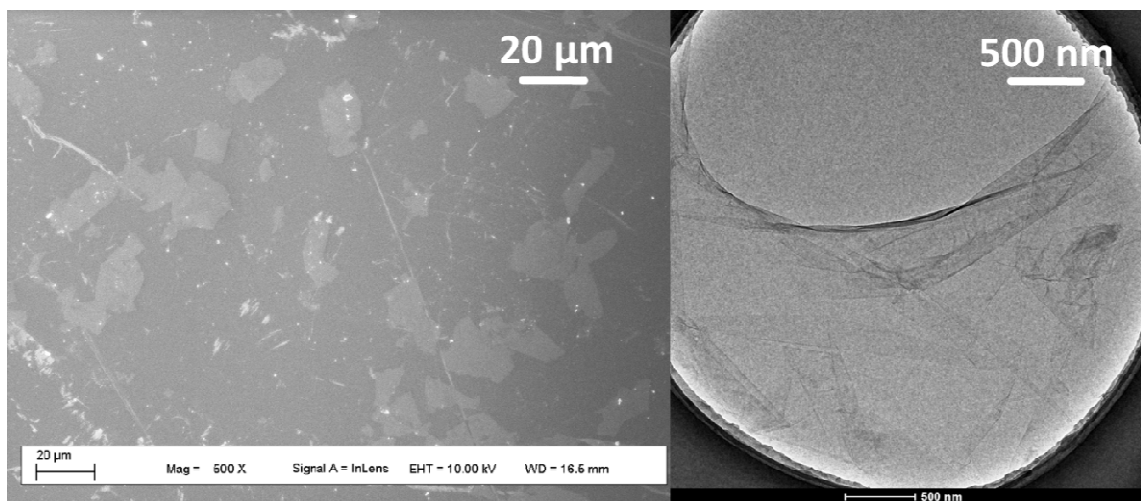

**Figure S2** SEM images of GO sheets deposited on silicon slice and TEM image of GO sheets.

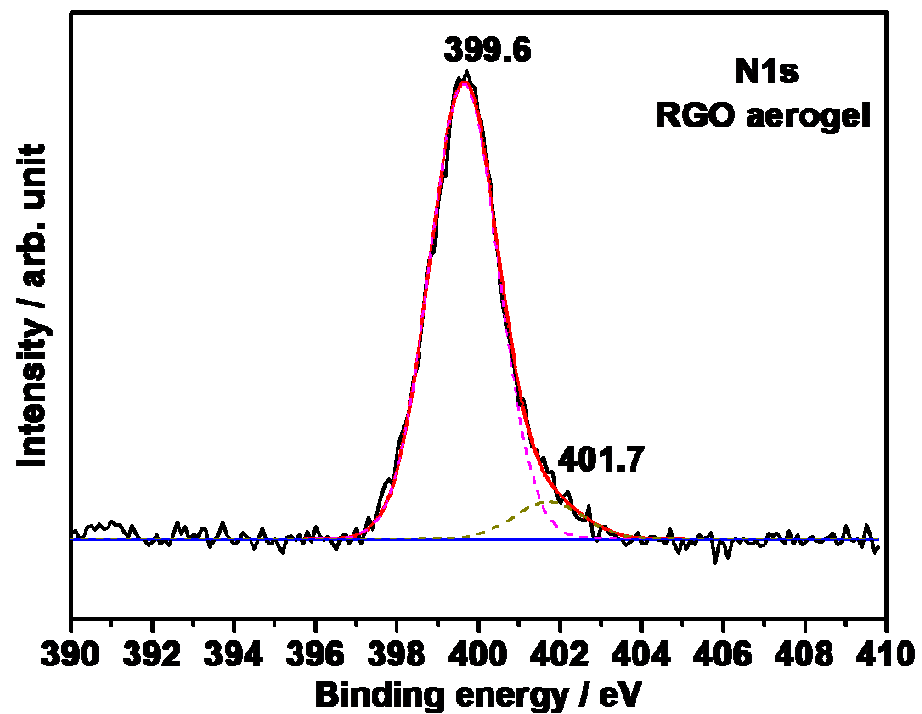

Figure S3 XPS N1s narrow spectrum of RGO aerogel.

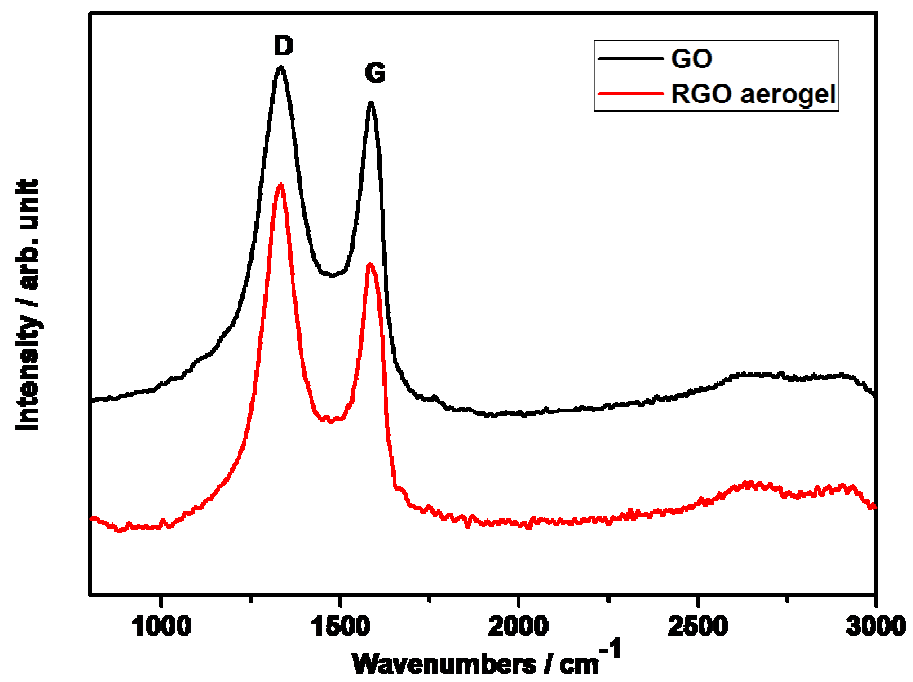

Figure S4 Raman spectra of GO and RGO aerogel.

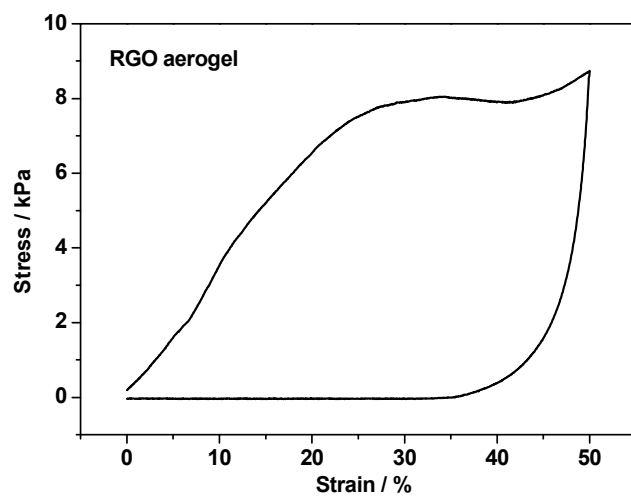

**Figure S5** Compressive stress-strain curve of RGO aerogel.

**Table S1** Elemental analysis data of GO, GO-i and RGO aerogel

|             | Weight percentage (%) |      |       | Elemental ratio |       |
|-------------|-----------------------|------|-------|-----------------|-------|
|             | C                     | N    | O     | C/O             | C/N   |
| GO          | 60.88                 | 0.77 | 38.35 | 2.12            | 92.24 |
| GO-i        | 57.41                 | 1.97 | 40.62 | 1.88            | 34.00 |
| RGO aerogel | 80.73                 | 7.19 | 12.09 | 8.90            | 13.10 |
